# Supplementary material for: Racial-Ethnic Differences in Treatment Initiation for New Diagnoses of Perinatal Depression
Source: Atypon-hosted journal article supplement (doi:10.1176/appi.ps.20220173), 2022-10-13
Supplement: appi.ps.20220173.ds001.pdf [file appi.ps.20220173.ds001.pdf]

| <b>Supplemental Table 1. Associations between Race/Ethnicity and Depression Treatment Type during the Prenatal Period</b>                                                                                                                                                                              |                    |              |                                |              |                                             |              |
|--------------------------------------------------------------------------------------------------------------------------------------------------------------------------------------------------------------------------------------------------------------------------------------------------------|--------------------|--------------|--------------------------------|--------------|---------------------------------------------|--------------|
|                                                                                                                                                                                                                                                                                                        | Psychotherapy only |              | Antidepressant medication only |              | Psychotherapy and antidepressant medication |              |
|                                                                                                                                                                                                                                                                                                        | aRR                | 95% CI       | aRR                            | 95% CI       | aRR                                         | 95% CI       |
| <b>Adjusted Model<sup>a</sup></b>                                                                                                                                                                                                                                                                      |                    |              |                                |              |                                             |              |
| White                                                                                                                                                                                                                                                                                                  | 1                  |              | 1                              |              | 1                                           |              |
| Latina                                                                                                                                                                                                                                                                                                 | 1.36               | (1.20, 1.53) | 0.75                           | (0.60, 0.92) | 0.90                                        | (0.71, 1.14) |
| Black                                                                                                                                                                                                                                                                                                  | 1.50               | (1.27, 1.77) | 0.59                           | (0.43, 0.80) | 0.71                                        | (0.49, 1.02) |
| Asian                                                                                                                                                                                                                                                                                                  | 1.30               | (1.12, 1.51) | 0.42                           | (0.29, 0.62) | 0.66                                        | (0.47, 0.94) |
| <b>Sensitivity Analysis (n=3,348)<sup>b</sup></b>                                                                                                                                                                                                                                                      |                    |              |                                |              |                                             |              |
| White                                                                                                                                                                                                                                                                                                  | 1                  |              | 1                              |              | 1                                           |              |
| Latina                                                                                                                                                                                                                                                                                                 | 1.33               | (1.12, 1.58) | 0.59                           | (0.42, 0.83) | 0.91                                        | (0.66, 1.26) |
| Black                                                                                                                                                                                                                                                                                                  | 1.46               | (1.15, 1.85) | 0.65                           | (0.41, 1.06) | 0.73                                        | (0.44, 1.20) |
| Asian                                                                                                                                                                                                                                                                                                  | 1.32               | (1.08, 1.61) | 0.49                           | (0.30, 0.81) | 0.65                                        | (0.41, 1.03) |
| <sup>a</sup> Relative Risk adjusted for maternal age at delivery, parity, prenatal Medicaid coverage, Charlson comorbidity index, prenatal care initiation, pre-pregnancy BMI, alcohol use during pregnancy, tobacco use during pregnancy, other drug use during pregnancy, prenatal anxiety diagnosis |                    |              |                                |              |                                             |              |
| <sup>b</sup> Sensitivity Analysis restricting to the 3,348 women with a prenatal PHQ-9 screen with additional adjustment for depression symptom severity (PHQ-score).                                                                                                                                  |                    |              |                                |              |                                             |              |

| <b>Supplemental Table 2. Associations between Race/Ethnicity and Depression Treatment Type during the Postpartum Period</b>                                                                                                                                                                                        |                    |              |                                |              |                                             |              |
|--------------------------------------------------------------------------------------------------------------------------------------------------------------------------------------------------------------------------------------------------------------------------------------------------------------------|--------------------|--------------|--------------------------------|--------------|---------------------------------------------|--------------|
|                                                                                                                                                                                                                                                                                                                    | Psychotherapy only |              | Antidepressant medication only |              | Psychotherapy and antidepressant medication |              |
|                                                                                                                                                                                                                                                                                                                    | aRR                | 95% CI       | aRR                            | 95% CI       | aRR                                         | 95% CI       |
| <b>Adjusted Model<sup>a</sup></b>                                                                                                                                                                                                                                                                                  |                    |              |                                |              |                                             |              |
| White                                                                                                                                                                                                                                                                                                              | 1                  |              | 1                              |              | 1                                           |              |
| Latina                                                                                                                                                                                                                                                                                                             | 1.11               | (1.01, 1.20) | 0.62                           | (0.54, 0.71) | 0.96                                        | (0.86, 1.07) |
| Black                                                                                                                                                                                                                                                                                                              | 1.30               | (1.16, 1.46) | 0.50                           | (0.39, 0.63) | 0.98                                        | (0.84, 1.15) |
| Asian                                                                                                                                                                                                                                                                                                              | 1.11               | (1.01, 1.22) | 0.47                           | (0.38, 0.58) | 0.96                                        | (0.84, 1.08) |
| <b>Sensitivity Analysis (n=3,099)<sup>b</sup></b>                                                                                                                                                                                                                                                                  |                    |              |                                |              |                                             |              |
| White                                                                                                                                                                                                                                                                                                              | 1                  |              | 1                              |              |                                             |              |
| Latina                                                                                                                                                                                                                                                                                                             | 1.14               | (1.02, 1.28) | 0.55                           | (0.43, 0.69) | 0.89                                        | (0.77, 1.04) |
| Black                                                                                                                                                                                                                                                                                                              | 1.31               | (1.14, 1.52) | 0.63                           | (0.45, 0.89) | 0.78                                        | (0.61, 0.99) |
| Asian                                                                                                                                                                                                                                                                                                              | 1.16               | (1.03, 1.30) | 0.38                           | (0.27, 0.54) | 0.94                                        | (0.79, 1.11) |
| <sup>a</sup> Relative risk adjusted for maternal age at delivery, parity, postpartum Medicaid coverage, Charlson comorbidity index, prenatal care initiation, pre-pregnancy BMI, alcohol use during pregnancy, tobacco use during pregnancy, other drug use during pregnancy, anxiety diagnosis during postpartum. |                    |              |                                |              |                                             |              |
| <sup>b</sup> Sensitivity Analysis restricting to the 3,099 women with a postpartum PHQ-9 screen with additional adjustment for depression symptom severity (PHQ-9 score)                                                                                                                                           |                    |              |                                |              |                                             |              |

| <b>Appendix A. List of International Statistical Classification of Diseases and Related Health Problems (ICD) depression diagnosis codes included in the analysis.</b> |                                                                                        |
|------------------------------------------------------------------------------------------------------------------------------------------------------------------------|----------------------------------------------------------------------------------------|
| <b>ICD-9 depression diagnosis codes</b>                                                                                                                                | 296.20 - 296.25<br>296.30 - 296.35<br>298.0<br>300.4<br>309.0<br>309.1<br>311<br>648.4 |
| <b>ICD-10 depression diagnosis codes</b>                                                                                                                               | F33.9<br>F34.1<br>F43.21<br>F43.23<br>F53.0<br>O90.6<br>O99.34                         |

| <b>Appendix B. List of antidepressant medications by class and current procedural terminology (CPT) codes included in the analysis.</b> |                                                                                                                                                              |
|-----------------------------------------------------------------------------------------------------------------------------------------|--------------------------------------------------------------------------------------------------------------------------------------------------------------|
| <b>Appendix B.1. Antidepressant medication class and generic name</b>                                                                   |                                                                                                                                                              |
| <b>Class</b>                                                                                                                            | <b>Generic medication</b>                                                                                                                                    |
| SSRIs                                                                                                                                   | Citalopram                                                                                                                                                   |
|                                                                                                                                         | Escitalopram                                                                                                                                                 |
|                                                                                                                                         | Fluoxetine                                                                                                                                                   |
|                                                                                                                                         | Fluvoxamine                                                                                                                                                  |
|                                                                                                                                         | Paroxetine                                                                                                                                                   |
|                                                                                                                                         | Sertraline                                                                                                                                                   |
| Tricyclic acids                                                                                                                         | Amitriptyline                                                                                                                                                |
|                                                                                                                                         | Clomipramine                                                                                                                                                 |
|                                                                                                                                         | Desipramine                                                                                                                                                  |
|                                                                                                                                         | Nortriptyline                                                                                                                                                |
|                                                                                                                                         | Doxepin                                                                                                                                                      |
|                                                                                                                                         | Imipramine                                                                                                                                                   |
|                                                                                                                                         | Protriptyline                                                                                                                                                |
|                                                                                                                                         | Trimipramine                                                                                                                                                 |
| SNRIs                                                                                                                                   | Desvenlafaxine                                                                                                                                               |
|                                                                                                                                         | Duloxetine                                                                                                                                                   |
|                                                                                                                                         | Milnacipran                                                                                                                                                  |
|                                                                                                                                         | Venlafaxine                                                                                                                                                  |
|                                                                                                                                         | Monoamine oxidase inhibitors (phenelzine and tranylcypromine)                                                                                                |
| Others                                                                                                                                  | Trazodone                                                                                                                                                    |
|                                                                                                                                         | Bupropion                                                                                                                                                    |
|                                                                                                                                         | Atomoxetine                                                                                                                                                  |
|                                                                                                                                         | Mirtazapine                                                                                                                                                  |
|                                                                                                                                         | Nefazodone                                                                                                                                                   |
|                                                                                                                                         | Vilazodone                                                                                                                                                   |
| <b>Appendix B.2. Current Procedural Terminology (CPT) Code and Description</b>                                                          |                                                                                                                                                              |
| <b>Current Procedural Terminology (CPT) Code</b>                                                                                        | <b>Description</b>                                                                                                                                           |
| 90785                                                                                                                                   | Interactive Complexity (90785) is an add-on code specific for psychiatric services and refers to communication difficulties during the psychiatric procedure |
| 90791                                                                                                                                   | Psychiatric diagnostic evaluation                                                                                                                            |
| 90792                                                                                                                                   | Psychiatric diagnostic evaluation with medical services                                                                                                      |
| 90801                                                                                                                                   | Psychiatric diagnostic interview examination                                                                                                                 |
| 90802                                                                                                                                   | Interactive psychiatric diagnostic evaluation                                                                                                                |
| 90806                                                                                                                                   | Outpatient psychotherapy 45-50 min                                                                                                                           |
| 90807                                                                                                                                   | Individual therapy with med mgt 45-50 min                                                                                                                    |
| 90808                                                                                                                                   | Outpatient psychotherapy 75-80 min                                                                                                                           |
| 90809                                                                                                                                   | Individual therapy with med mgt 75-80 min                                                                                                                    |

|                                             |                                                                                                  |
|---------------------------------------------|--------------------------------------------------------------------------------------------------|
| 90812                                       | Interactive therapy 45–50 min                                                                    |
| 90813                                       | Interactive therapy with med mgt 45–50 min                                                       |
| 90814                                       | Interactive therapy 75 – 80 min                                                                  |
| 90815                                       | Interactive therapy with med mgt 75 – 80 min                                                     |
| 90818                                       | Inpatient psychotherapy 45-50 min                                                                |
| 90819                                       | Inpatient psychotherapy with med mgt 45-50 min                                                   |
| 90820                                       | Interactive psychiatric diagnostic evaluation (replaced by 90802)                                |
| 90821                                       | Inpatient psychotherapy 75-80 min                                                                |
| 90822                                       | Inpatient psychotherapy with med mgt 75-80 min                                                   |
| 90826                                       | Inpatient Interactive therapy 45–50 min                                                          |
| 90827                                       | Inpatient Interactive therapy with med mgt 45–50 min                                             |
| 90828                                       | Inpatient Interactive therapy 75–80 min                                                          |
| 90832                                       | Psychotherapy, 30 min with patient and/or family member                                          |
| 90833                                       | Psychotherapy, 30 min with patient and/or family member with med mgt                             |
| 90834                                       | Psychotherapy, 45 min with patient and/or family member                                          |
| 90836                                       | Psychotherapy, 45 min with patient and/or family member with med mgt                             |
| 90837                                       | Psychotherapy, 60 min with patient and/or family member                                          |
| 90838                                       | Psychotherapy, 60 min with patient and/or family member with med mgt                             |
| 90839                                       | Psychotherapy for crisis, first 60 minutes                                                       |
| 90840                                       | Psychotherapy for crisis 30 min add-on                                                           |
| 90844                                       | Outpatient psychotherapy 45-50 min (replaced by 90806)                                           |
| 90845                                       | Psychoanalysis                                                                                   |
| 90847                                       | Family psychotherapy (conjoint psychotherapy, with patient present)                              |
| 90849                                       | Multiple-family group psychotherapy                                                              |
| 90853                                       | Group psychotherapy (other than of a multiple-family group)                                      |
| 90857                                       | Interactive group psychotherapy                                                                  |
| 90875                                       | Individual Psychophysiological Therapy Incorporating Biofeedback Training by any Modality, 20-30 |
| 90876                                       | Individual Psychophysiological Therapy Incorporating Biofeedback Training by any Modality, 45    |
| 90880                                       | Hypnotherapy                                                                                     |
| 90882                                       | environmental intervention for med mgmt                                                          |
| 90885                                       | Psychiatric Evaluation of Hospital Records                                                       |
| 90887                                       | Interpretation or Explanation of Results of Psychiatric etc                                      |
| 90889                                       | Preparation of Report of Patient Psychiatric Status etc                                          |
| 90899                                       | Unlisted Psychiatric Service or Procedure                                                        |
| <b>Kaiser Permanente<br/>Specific Codes</b> |                                                                                                  |
| 240689                                      | Group psychotherapy, interactive complex                                                         |
| 240688                                      | Psychotherapy w pat and or family member, 60 min, interactive complex.                           |
| 240687                                      | Psychotherapy w pat and or family member, 45 min, interactive complex.                           |
| 240807                                      | Psychotherapy, w pat and or family member, 45 min, w eval & mgmt, w interactive complexity.      |

|        |                                                                                             |
|--------|---------------------------------------------------------------------------------------------|
| 240685 | Psychiatric diagnostic eval, interactive complex                                            |
| 240806 | Psychotherapy, w pat and or family member, 30 min, w eval & mgmt, w interactive complexity. |
| 240805 | Psychiatric diagnostic eval w medical services, w interactive complexity                    |
| 250669 | Psychotherapy w pat 60 min, interactive complex                                             |
| 240686 | Psychotherapy w pat and or family member, 30 min, interactive complex.                      |
| 250665 | Psychotherapy w pat 45 min, interactive complex                                             |
| 240808 | Psychotherapy, w pat and or family member, 60 min, w eval & mgmt, w interactive complexity. |
| 251038 | Psychotherapy w pat 30 min, interactive complex                                             |
| 240692 | Psychotherapy for crisis, 105 - 134 min                                                     |
| 240690 | Psychotherapy for crisis, 75 - 104 min                                                      |
| 251039 | Psychotherapy w pat 30 min, w eval & mgmt, w interactive complexity                         |
| 216638 | Psychiatry - ongoing inpatient consultation                                                 |
| 216637 | Psychiatry - initial inpatient consultation.                                                |
| 230266 | Admit to psychiatric health facility                                                        |
